# Supplementary material
Source: PubMed Central journal article supplement (PMC2820976)
Supplement: supp_76_4_1173__1.pdf [file supp_76_4_1173__1.pdf]

TABLE S1. *Aphanizomenon*, *Anabaena* and *Anabaenopsis* strains from different freshwater lakes evaluated in this study, ELISA and LC-MS/MS results and genetic properties. - = not detected.

| Species/strain              | Lake        | ELISA<br>CYN | LC-<br>MS/MS<br>CYN | ELISA<br>PSP | LC-<br>MS/MS<br>PSP | LC-<br>MS/MS<br>ATX | Accession number<br><i>sxtA</i> | PC-IGS   |
|-----------------------------|-------------|--------------|---------------------|--------------|---------------------|---------------------|---------------------------------|----------|
| <b><i>Aphanizomenon</i></b> |             |              |                     |              |                     |                     |                                 |          |
| <b><i>A. gracile</i></b>    |             |              |                     |              |                     |                     |                                 |          |
| AB2008/06                   | Langer      | -            | -                   | -            | -                   | -                   | -                               | FN552292 |
| AB2002/10                   | Langer      | -            | -                   | -            | -                   | -                   | -                               | FN552293 |
| AB2008/14                   | Langer      | -            | -                   | -            | -                   | -                   | -                               | FN552294 |
| AB2008/15                   | Langer      | -            | -                   | -            | -                   | -                   | -                               | FN552295 |
| AB2008/25                   | Melang      | -            | -                   | -            | -                   | -                   | -                               | FN552301 |
| AB2008/26                   | Melang      | -            | -                   | -            | -                   | -                   | -                               | FN552302 |
| AB2008/27                   | Melang      | -            | -                   | -            | -                   | -                   | -                               | FN552303 |
| AB2008/32                   | Melang      | -            | -                   | -            | -                   | -                   | -                               | FN552306 |
| AB2008/34                   | Scharmützel | -            | -                   | -            | -                   | -                   | -                               | FN552307 |
| AB2008/35                   | Scharmützel | -            | -                   | -            | -                   | -                   | -                               | FN552308 |
| AB2008/36                   | Langer      | -            | -                   | -            | -                   | -                   | -                               | FN552309 |
| AB2008/39                   | Langer      | -            | -                   | -            | -                   | -                   | -                               | FN552310 |
| AB2008/41                   | Langer      | -            | -                   | -            | -                   | -                   | -                               | FN552311 |
| AB2008/53                   | Langer      | -            | -                   | -            | -                   | -                   | -                               | FN552317 |
| AB2008/62                   | Langer      | -            | -                   | -            | -                   | -                   | -                               | FN552319 |
| AB2008/66                   | Melang      | -            | -                   | -            | -                   | -                   | -                               | FN552321 |
| AB2008/67                   | Langer      | -            | -                   | -            | -                   | -                   | -                               | FN552322 |
| AB2008/73                   | Langer      | -            | -                   | -            | -                   | -                   | -                               | FN552323 |
| AB2008/82                   | Langer      | -            | -                   | -            | -                   | -                   | -                               | FN552324 |
| AB2008/105                  | Melang      | -            | -                   | -            | -                   | -                   | -                               | FN552325 |
| <b><i>A. flos-aquae</i></b> |             |              |                     |              |                     |                     |                                 |          |
| AB2008/70                   | Scharmützel | -            | -                   | -            | -                   | -                   | -                               | FN552369 |
| AB2008/89                   | Stechlin    | -            | -                   | -            | -                   | -                   | -                               | FN552367 |
| AB2008/98                   | Langer      | -            | -                   | -            | -                   | -                   | -                               | FN552368 |
| ST43                        | Stechlin    | -            | -                   | -            | -                   | -                   | -                               | FN552353 |
| ST44                        | Stechlin    | -            | -                   | -            | -                   | -                   | -                               | FN552354 |
| ST53                        | Stechlin    | -            | -                   | -            | -                   | -                   | -                               | FN552355 |
| ST72                        | Stechlin    | -            | -                   | -            | -                   | -                   | -                               | FN552356 |
| ST84                        | Stechlin    | -            | -                   | -            | -                   | -                   | -                               | FN552357 |
| ST86                        | Stechlin    | -            | -                   | -            | -                   | -                   | -                               | FN552358 |
| ST97                        | Stechlin    | -            | -                   | -            | -                   | -                   | -                               | FN552349 |
| ST98                        | Stechlin    | -            | -                   | -            | -                   | -                   | -                               | FN552359 |
| ST115                       | Stechlin    | -            | -                   | -            | -                   | -                   | -                               | FN552360 |

|                         |             |   |   |   |   |   |   |          |
|-------------------------|-------------|---|---|---|---|---|---|----------|
| ST134                   | Stechlin    | - | - | - | - | - | - | FN552364 |
| ST147                   | Stechlin    | - | - | - | - | - | - | FN552365 |
| <i>A. issatschenkoi</i> |             |   |   |   |   |   |   |          |
| AB2008/05               | Langer      | - | - | - | - | - | - | FN552373 |
| AB2008/12               | Langer      | - | - | - | - | - | - | FN552377 |
| AB2008/76               | Langer      | - | - | - | - | - | - | FN552378 |
| <i>Anabaena</i>         |             |   |   |   |   |   |   |          |
| <i>A. bergii</i>        |             |   |   |   |   |   |   |          |
| AB2008/43               | Melang      | - | - | - | - | - | - | FN552379 |
| AB2008/44               | Melang      | - | - | - | - | - | - | FN552380 |
| AB2008/45               | Melang      | - | - | - | - | - | - | FN552381 |
| <i>A. crassa</i>        |             |   |   |   |   |   |   |          |
| AB2008/56               | Nehmitz     | - | - | - | - | - | - | FN552341 |
| <i>A. flos-aquae</i>    |             |   |   |   |   |   |   |          |
| AB2008/17               | Scharmützel | - | - | - | - | - | - | FN552350 |
| AB2008/22               | Scharmützel | - | - | - | - | - | - | FN552351 |
| <i>A. lemmermanii</i>   |             |   |   |   |   |   |   |          |
| AB2008/85               | Nehmitz     | - | - | - | - | - | - | FN552370 |
| AB2008/86               | Nehmitz     | - | - | - | - | - | - | FN552371 |
| AB2008/87               | Nehmitz     | - | - | - | - | - | - | FN552372 |
| <i>A. planktonica</i>   |             |   |   |   |   |   |   |          |
| AB2008/01               | Stechlin    | - | - | - | - | - | - | FN552333 |
| AB2008/03               | Stechlin    | - | - | - | - | - | - | FN552334 |
| AB2008/04               | Stechlin    | - | - | - | - | - | - | FN552335 |
| AB2008/20               | Stechlin    | - | - | - | - | - | - | FN552336 |
| AB2008/24               | Scharmützel | - | - | - | - | - | - | FN552337 |
| AB2008/30               | Scharmützel | - | - | - | - | - | - | FN552338 |
| AB2008/33               | Langer      | - | - | - | - | - | - | FN552346 |
| AB2008/38               | Stechlin    | - | - | - | - | - | - | FN552339 |
| AB2008/46               | Stechlin    | - | - | - | - | - | - | FN552340 |
| AB2008/57               | Stechlin    | - | - | - | - | - | - | FN552342 |
| AB2008/68               | Langer      | - | - | - | - | - | - | FN552347 |
| AB2008/74               | Langer      | - | - | - | - | - | - | FN552343 |
| AB2008/90               | Langer      | - | - | - | - | - | - | FN552348 |
| AB2008/92               | Langer      | - | - | - | - | - | - | FN552344 |
| AB2008/95               | Langer      | - | - | - | - | - | - | FN552345 |
| ST91                    | Stechlin    | - | - | - | - | - | - | FN552327 |
| ST190                   | Stechlin    | - | - | - | - | - | - | FN552329 |
| ST191                   | Stechlin    | - | - | - | - | - | - | FN552330 |
| ST196                   | Stechlin    | - | - | - | - | - | - | FN552332 |
| <i>Anabaena sp.</i>     |             |   |   |   |   |   |   |          |
| AB2008/64               | Stechlin    | - | - | - | - | - | - | FN552352 |
| <i>Anabaenopsis</i>     |             |   |   |   |   |   |   |          |

*A. elenkinii*

AB2008/69

Langer

-

-

-

-

-

-

FN552383

---
